# Supplementary material
Source: PubMed Central journal article supplement (PMC3070584)
Supplement: mmc1.pdf [file mmc1.pdf]

Figure S1

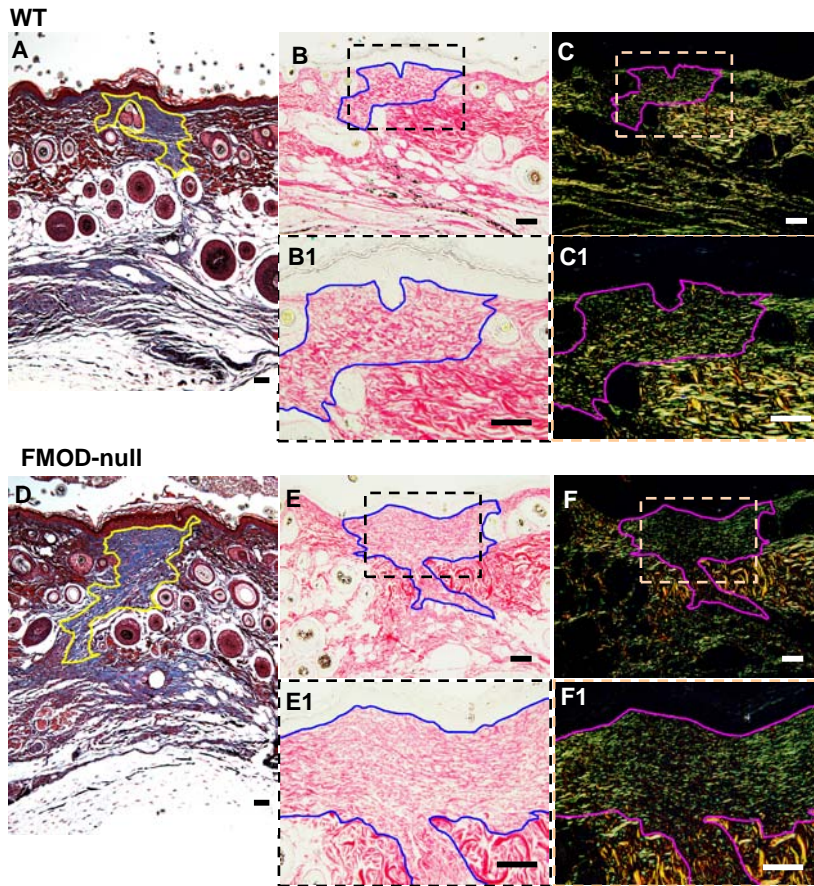

Figure S1: Light microscope of trichrome staining (A and D) and picosirius red staining (without polarized light, B and E; with polarized light, C and F) of post-operative day 14 skin wounds in WT (A-C) and FMOD-null (D-F) mice. Scar areas were outlined. Bar: 1,000  $\mu\text{m}$ .
